# Supplementary material for: Correlation between Phenotype and Genotype in CTNNB1 Syndrome: A Systematic Review of the Literature
Source: MDPI journal article supplement (doi:10.3390/ijms232012564), 2022-10-19
Supplement: s1 [file s1]

**Table S1.** *Spectrum of 84 published CTNNB1 cases*

| #  | Genetic mutation |               |                   |               | Gender | Age (yrs) | Birth measurments |            |          | Facial dysmorphism | Eye conditions                              | Micro-encephaly | Axial hypotonia/spasticity | Achieving milestones |               |                                       |                                                                       | Additional clinical features                                         | Source (quality score)             |
|----|------------------|---------------|-------------------|---------------|--------|-----------|-------------------|------------|----------|--------------------|---------------------------------------------|-----------------|----------------------------|----------------------|---------------|---------------------------------------|-----------------------------------------------------------------------|----------------------------------------------------------------------|------------------------------------|
|    | Exon             | Variant       | Amino acid change | Mutation type |        |           | Lenght (cm)       | Weight (g) | OFC (cm) |                    |                                             |                 |                            | Sitting (mo)         | Crawling (mo) | Walking independetly                  | Speaking                                                              |                                                                      |                                    |
| 1  | E3               | c.99_100delTG | p.Gly34Asnfs*15   | Frameshift    | Male   | 5,5       | 49                | 3160       | NA       | +                  | Strabismus                                  | +               | +/+                        | 14 ; still head-leg  | 25            | 6 yrs (cannot stand alone)            | Short sentences                                                       | Concentration is limited; sensitive to noises, friendly              | Kuechler et al. 2015 [2]           |
| 2  | E3               | c.160G>T      | p.Glu54*          | Nonsense      | NA     | NA        | NA                | NA         | NA       | NA                 | Strabismus                                  | NA              | +/+                        | NA                   | NA            | Walking with ASO                      | NA                                                                    | Dystonia; middle ear effusions                                       | Jin et al. 2020 [5]                |
| 3  | E3               | c.214_215del  | p.Gln72fs         | Frameshift    | Male   | 5         | NA                | NA         | NA       | NA                 | Normal                                      | +               | +/+                        | NA                   | NA            | NA                                    | Absent speech                                                         | GDD, asthma, spastic diplegia                                        | Rossetti et al 2021 [22]           |
| 4  | E3               | c.232C>T      | p.Gln78*          | Nonsense      | Male   | 11        | 53                | 2900       | NA       | +                  | Strabismus, hyperopia, astigmatism          | -               | +/+                        | NA                   | Didnt crawl   | 3 yrs; at 11 yrs coordination problem | Unclear speech; at 11 yrs regression                                  | aggression, anxiety, friendly, sleep problems, stereotypic movements | Winczewska-Wiktor et al. 2016 [23] |
| 5  | Intron 3         | c.242-1G>C    | Splice mutation   | Splice        | Female | 11        | NA                | NA         | NA       | NA                 | Divergent strabismus                        | -               | +/+                        | NA                   | NA            | NA                                    | NA                                                                    | NA                                                                   | Ho et al. 2021 [24]                |
| 6  | E4               | c.274C>T      | p.Gln92*          | Nonsense      | NA     | NA        | NA                | NA         | NA       | NA                 | NA                                          | NA              | NA                         | NA                   | NA            | NA                                    | NA                                                                    | Abnormality of the nervous system                                    | Retterer et al. 2016 [25]          |
| 7  | E4               | c.283C>T      | p.Arg95*          | Nonsense      | Female | 4         | 51                | 3300       | NA       | +                  | Normal                                      | +               | +/+                        | NA                   | 12            | 4 yrs                                 | Speech apraxia, ~50 words                                             | Aggression when younger, now has stopped                             | Kuechler et al. 2015 [2]           |
| 8  | E4               | c.283C>T      | p.Arg95*          | Nonsense      | NA     | NA        | NA                | NA         | NA       | NA                 | NA                                          | NA              | NA                         | NA                   | NA            | NA                                    | NA                                                                    | NA                                                                   | Posey et al. 2017 [26]             |
| 9  | E4               | c. 367 C>T    | p.Phe99PhefsTer5  | Frameshift    | NA     | NA        | NA                | NA         | NA       | NA                 | NA                                          | +               | +/+                        | NA                   | NA            | NA                                    | Non-verbal                                                            | Bilateral frontal pachygyria; spastic diplegia                       | Jin et al. 2020 [5]                |
| 10 | E4               | c.400C>T      | p.Gln123*         | Nonsense      | Male   | 12        | NA                | NA         | NA       | NA                 | Normal                                      | -               | +/+                        | NA                   | NA            | NA                                    | NA                                                                    | osteogenesis imperfecta, dystonia, blue sclera                       | Ho et al. 2021 [24]                |
| 11 | E4               | c.423_424insG | p.Tyr142Valfs*4   | Frameshift    | Female | 5,6       | 51                | 3450       | 33       | +                  | Strabismus                                  | +               | +/-                        | NA                   | 24            | not yet                               | Severe, few words (30), sign language                                 | repetitive movements, poor sleeping in infancy                       | Kuechler et al. 2015 [2]           |
| 12 | E4               | c.493C>T      | p.Gln165*         | Nonsense      | Male   | 7         | NA                | NA         | NA       | NA                 | Left eye caract, hypermetropia, astigmatism | +               | +/+                        | NA                   | NA            | NA                                    | NA                                                                    | Dystonia                                                             | Ho et al. 2021 [24]                |
| 13 | E5               | c.521; T>C    | p.M174T           | Missense      | Female | 34        | NA                | NA         | NA       | NA                 | NA                                          | NA              | NA                         | NA                   | NA            | NA                                    | NA                                                                    | Severe simple schizophrenia                                          | Levchenko et al. 2015 [27]         |
| 14 | E5               | c.705dupA     | p.Gly236Argfs*35  | Frameshift    | Female | 14        | NA                | 2510       | 32       | +                  | Strabismus                                  | +               | +/-                        | 12                   | NA            | 4.5 yrs                               | Babbling at 3yrs, 14 yrs speaking simple sentences, read simple words | Autism                                                               | Tucci et al. 2014 [28]             |
| 15 | Intron 5         | c.734+1G>T    | Splice mutation   | Splice        | Female | 32        | 50                | 3200       | 33,5     | +                  | Strabismus                                  | +               | +/+                        | 2-5 years (40mo)     | NA            | No                                    | Absent speech                                                         | Autism, aggression, ritualistic behaviours, involuntary gestures     | Verhoeven et al. 2020 [1]          |
| 16 | Intron 5         | c.734+1G>A    | Splice mutation   | Splice        | Female | 49        | NA                | NA         | NA       | +                  | FEVR                                        | NA              | +/+                        | NA                   | NA            | NA                                    | Absent speech                                                         | Involuntary rotation of head                                         | Wang et al. 2019 [29]              |

|    | Genetic mutation |                               |                        |               | Gender | Age (yrs) | Birth measurments |            |          | Facial dysmorphism | Eye conditions                                                                   | Micro-encephaly | Axial hypotonia/spasticity | Achieving milestones |               |                                  |                                                                                          | Additional clinical features                                                         | Source (data quality assessment)             |
|----|------------------|-------------------------------|------------------------|---------------|--------|-----------|-------------------|------------|----------|--------------------|----------------------------------------------------------------------------------|-----------------|----------------------------|----------------------|---------------|----------------------------------|------------------------------------------------------------------------------------------|--------------------------------------------------------------------------------------|----------------------------------------------|
|    | Exon             | Variant                       | Amino acid change      | Mutation type |        |           | Lenght (cm)       | Weight (g) | OFC (cm) |                    |                                                                                  |                 |                            | Sitting (mo)         | Crawling (mo) | Walking independently (yrs)      | Speaking                                                                                 |                                                                                      |                                              |
| 17 | Intron 5         | c.734+1G>A                    | Splice mutation        | Splice        | Female | 27 years  | NA                | NA         | NA       | +                  | FEVR                                                                             | NA              | NA                         | NA                   | NA            | Walking at 49 yrs (ataxic)       | Absent speech                                                                            | deep tendon hyperreflexia, babinski sign, paroxysmal dystonic HN                     | Wang et al. 2019 [29]                        |
| 18 | E6               | c.755delTins AAC              | p.Leu252*              | Nonsense      | Female | 15,3      | 51                | 2950       | 33       | +                  | Strabismus, hyperopia mild esotropia, mild hyperopia and astigmatism, strabismus | -               | +/+                        | NA                   | NA            | 10 yrs                           | 2 words                                                                                  | Dystonia                                                                             | Kuechler et al. 2015 [2]                     |
| 19 | E6               | c.776_777deITC                | p.Leu259Profs*11       | Frameshift    | Male   | 7         | NA                | Poor (NA)  | NA       | NA                 |                                                                                  | +               | NA/+                       | NA                   | NA            | NA                               | NA                                                                                       | Aggressive behaviour, GDD, restless leg, bradykinesia, toe walking, spastic diplegia | Rossetti et al 2021 [22]                     |
| 20 | E6               | c.796C>T                      | p.Gln266*              | Nonsense      | NA     | NA        | NA                | NA         | NA       | NA                 | NA                                                                               | NA              | NA                         | NA                   | NA            | NA                               | NA                                                                                       | NA                                                                                   | Retterer et al. 2016 [25]                    |
| 21 | E6               | c.799_809deIGAAGGAGCTAAinsGAA | p.Gly268TrpfsTer5      | Frameshift    | Female | 7         | NA                | 3100       | NA       | +                  | NA                                                                               | +               | +/+                        | 18                   | NA            | 3 (broad based gait)             | No speech                                                                                | Intermittent loss of skills                                                          | Kharbanda et al. 2017 [30]                   |
| 22 | E6               | c.835delC                     | p.Leu279Cysfs*26       | Frameshift    | NA     | NA        | NA                | NA         | NA       | NA                 | NA                                                                               | NA              | NA                         | NA                   | NA            | NA                               | NA                                                                                       | NA                                                                                   | Grozeva et al. 2015 [31]                     |
| 23 | E7               | c.925C>T                      | p.Gln309*              | Nonsense      | Male   | 4,5       | NA                | NA         | NA       | +                  | Hyperopia                                                                        |                 |                            | 18                   | NA            | walking at 4.6 (short distances) | Started speaking at 4 years, but articulation was poor and it was hard to understand     | Happy, Feeding difficulties (chewing, swallowing)                                    | Ligt et al. 2012 [4], Tucci et al. 2014 [28] |
| 24 | E7               | c.998dupA                     | p.Tyr333*              | Nonsense      | NA     | NA        | NA                | NA         | NA       | NA                 | NA                                                                               | NA              | NA                         | NA                   | NA            | NA                               | NA                                                                                       | NA                                                                                   | Prasad et al. 2016 [32]                      |
| 25 | E7               | c.998dupA                     | p.Tyr333Ter            | Nonsense      | Female | 9         | NA                | 2980       | NA       | NA                 | NA                                                                               |                 |                            | 14                   | NA            | 4,2 (still had difficulties)     | Frst words age 4; more fluent speech age 6; said to be 3 years behind with verbal skills | Violent outburst, dystonia                                                           | Kharbanda et al. 2017 [30]                   |
| 26 | E7               | c.999C> G                     | p.Tyr333Ter            | Nonsense      | Female | 27 years  | NA                | 2920       | NA       | +                  | NA                                                                               | -               | +/+                        | 30                   | NA            | 4,5 (ataxic)                     | First words at 4.5 years; can speak in sentences but speech very unclear                 | Aggressive behaviour, Asthma; left clubfoot; increased dermatoglyphic whorls         | Kharbanda et al. 2017 [30]                   |
| 27 | E7               | c.999del                      | p.Tyr333*              | Nonsense      | Female | 15 mo     | NA                | NA         | NA       | NA                 | NA                                                                               | NA              | +/NA                       | NA                   | NA            | NA                               | NA                                                                                       | NA                                                                                   | Sun et al. 2019 [33]                         |
| 28 | E7               | c.1016_1025delinsT            | p.Thr339_Arg342delinsI | Frameshift    | Female | 3         | NA                | NA         | NA       | NA                 | TRD, strabismus, hyperopia, astigmatism                                          | +               | +/NA                       | NA                   | NA            | NA                               | NA                                                                                       | GDD, feeding aversion, and poor weight gain, Type-1 Diabetes                         | Rossetti et al 2021 [22]                     |
| 29 | E7               | c.1005delA                    | p.Lys335fs             | Frameshift    | Male   | 8         | NA                | NA         | NA       | NA                 | hyperopia, astigmatism, esotropia of the left eye, strabismus                    | +               | +/NA                       | NA                   | NA            | NA                               | Absent speech                                                                            | Aggressive, murmur, GDD, chronic diarrhea, dysplastic+ bicuspid pulmonary valve      | Rossetti et al 2021 [22]                     |

|    | Genetic mutation |                             |                    |               | Gender | Age (yrs) | Birth measurments |            |          | Facial dysmorphism | Eye conditions            | Micro-encephaly | Axial hypotonia/spasticity | Achieving milestones |               |                                                    |                                                                                | Additional clinical features                                                        | Source (data quality assessment)             |
|----|------------------|-----------------------------|--------------------|---------------|--------|-----------|-------------------|------------|----------|--------------------|---------------------------|-----------------|----------------------------|----------------------|---------------|----------------------------------------------------|--------------------------------------------------------------------------------|-------------------------------------------------------------------------------------|----------------------------------------------|
|    | Exon             | Variant                     | Amino acid change  | Mutation type |        |           | Lenght (cm)       | Weight (g) | OFC (cm) |                    |                           |                 |                            | Sitting (mo)         | Crawling (mo) | Walking independetly (yrs)                         | Speaking                                                                       |                                                                                     |                                              |
| 30 | E7               | c.1038_1044delGCTATCTinsGCT | p.Val349AlafsTer9  | Frameshift    | Female | 11        | NA                | 2700       | NA       | +                  | Strabismus, hypermetropia | +               | +/+                        | NA                   | 13,5          | 3,5 (ataxic)                                       | Single words at age 5 years, talks in sentences at age 11 years                | Stereotypes, aggressive behaviour, acquired teeth early from 3 months               | Kharbanda et al. 2017 [30]                   |
| 31 | E7               | c.1043_1044delCT            | p.Ser348CysfsX4    | Frameshift    | Female | 8         | NA                | NA         | NA       | NA                 | NA                        | +               | NA                         | NA                   | NA            | NA                                                 | NA                                                                             | GDD, dystonia                                                                       | Cordeiro et al. 2018 [34]                    |
| 32 | Intron 7         | c.1081+1G>C                 | IVS6 Intron 7      | Splice        | Male   | 3,8       | 47                | 2720       | >2SD     | +                  | Normal                    | +               | +/+                        | not yet              | not yet       | not yet                                            | Unclear speech                                                                 | dystonia; motor restlessness                                                        | Kuechler et al. 2015 [2]                     |
| 33 | E8               | c.1104delT                  | p.His369Thrfs*2    | Frameshift    | NA     | 4         | NA                | NA         | NA       | NA                 | FEVR                      | +               | NA                         | NA                   | NA            | NA                                                 | NA                                                                             | Autism                                                                              | Sun et al. 2019 [33]                         |
| 34 | E8               | c.1105_1109del              | p.His369Aspfs*24   | Frameshift    | Male   | 22        | NA                | NA         | NA       | NA                 | Divergent strabismus      | -               | +/+                        | NA                   | NA            | NA                                                 | NA                                                                             | Dystonia                                                                            | Ho et al. 2021 [24]                          |
| 35 | E8               | c.1127G>A                   | p.Arg376His        | Missense      | NA     | NA        | NA                | NA         | NA       | NA                 | NA                        | NA              | NA                         | NA                   | NA            | NA                                                 | NA                                                                             | ASD                                                                                 | Krupp et al., 2017 [44]                      |
| 36 | E8               | c.1163T>C                   | p.Leu388Pro        | Missense      | Female | 6,8       | 48                | 2500       | 30       | +                  | NA                        | +               | +/+                        | 13                   | 18            | 2,5                                                | Moderate, first word at 2 ½, 20 words at 4 years but not intelligible          | Delayed bone age; swallowing issues                                                 | Kuechler et al. 2015 [2]                     |
| 37 | E9               | c.1251_1252insACGTG         | p.Cys419*          | Nonsense      | Male   | 15 mo     | 50                | 3060       | 33       | NA                 | NA                        | +               | +/+                        | not yet              | not yet       | not yet                                            | Vocalized only a few syllables                                                 | Good eye contact, social smile                                                      | Kuechler et al. 2015 [2]                     |
| 38 | E9               | c.1272_1275del              | p.Ser425Thrfs*11   | Frameshift    | Female | 29        | NA                | NA         | NA       | +                  | NA                        | +               | +/+                        | 24                   | 3 years       | 8 (due to progressive spasticity now with support) | Started speaking first words between 9-10 years; now able to speak a few words | Aggression, automutilaton                                                           | Ligt et al. 2012 [4], Tucci et al. 2014 [28] |
| 39 | E9               | c.1272_1275del              | p.Ser425Thrfs*11   | Frameshift    | Female | 3,25      | 48                | 2425       | NA       | +                  | Strabismus                | -               | +/+                        | NA                   | NA            | not yet                                            | Babbles now (aged 3 3/12 years) constantly and some words are understandable   | very happy and friendly, but can show a low frustration tolerance, good eye contact | Kuechler et al. 2015 [2]                     |
| 40 | E9               | c. 1344_1345 InsertionA     | p.Arg449GlnfsTer24 | Frameshift    | Male   | 8         | NA                | NA         | NA       | NA                 | Strabismus                | +               | NA/+                       | NA                   | NA            | 8                                                  | First words at 3 years, at 8 years able to speak short sentences               | Spastic displegia; dystonia, hyperflexia, dysphagia, hypospadias,                   | Jin et al. 2020 [5]                          |
| 41 | E9               | c.1420C>T                   | p.Arg474*          | Nonsense      | Male   | 2         | 51.5              | 3830       | NA       | +                  | Strabismus                | -               | +/+                        | 18                   | No            | 2                                                  | limited words                                                                  | Sleeping and feeding problems, good eye contact, social                             | Kuechler et al. 2015 [2]                     |
| 42 | E9               | c.1420C>T                   | p.Arg474*          | Nonsense      | NA     | NA        | NA                | NA         | NA       | NA                 | Eye abnormality           | NA              | NA                         | NA                   | NA            | NA                                                 | NA                                                                             | NA                                                                                  | Retterer et al. 2016 [25]                    |
| 43 | E9               | c.1420C> T                  | p.Arg474Ter        | Nonsense      | Female | 13        | NA                | 3118       | NA       | +                  | Strabismus                | +               | +/+                        | 13                   | NA            | 3,5                                                | First words at 4,5 years                                                       | Aggressive, ADHD, mouths objects                                                    | Kharbanda et al. 2017 [30]                   |

| Genetic mutation |         |                   |                  |             | Gender | Age (yrs) | Birth measurments |          |              | Facial dysmorphism | Eye conditions                | Micro-encephaly | Axial hypotonia/spasticity | Achieving milestones |                            |                |                                           | Additional clinical features                                                                              | Source (data quality assessment)                 |
|------------------|---------|-------------------|------------------|-------------|--------|-----------|-------------------|----------|--------------|--------------------|-------------------------------|-----------------|----------------------------|----------------------|----------------------------|----------------|-------------------------------------------|-----------------------------------------------------------------------------------------------------------|--------------------------------------------------|
| Exon             | Variant | Amino acid change | Mutation type    | Lenght (cm) |        |           | Weight (g)        | OFC (cm) | Sitting (mo) |                    |                               |                 |                            | Crawling (mo)        | Walking independetly (yrs) | Speaking       |                                           |                                                                                                           |                                                  |
| 44               | E9      | c.1420C>T         | p.Arg474*        | Nonsense    | Female | 5.25      | 49                | 2410     | 31           | +                  | Strabismus                    | +               | +/+                        | 18                   | 23                         | not yet        | No words                                  | Stereotypic outbursts, feeding problems                                                                   | Kuechler et al. 2015 [2]                         |
| 45               | E9      | c.1434_1435insC   | p.Glu479Argfs*18 | Frameshift  | Male   | 8         | NA                | NA       | NA           | +                  | FEVR and divergent strabismus | +               | -/+                        | NA                   | NA                         | NA             | NA                                        | NA                                                                                                        | Panagiotou et al. 2017 [35]; Ho et al. 2021 [24] |
| 46               | E9      | c.1512G>A         | p.Trp504*        | Nonsense    | NA     | NA        | NA                | NA       | NA           | NA                 | NA                            | NA              | NA                         | NA                   | NA                         | NA             | NA                                        | Autism                                                                                                    | O’Roak et al. 2017 [44]                          |
| 47               | E9      | c.1543C>T         | p.Arg515*        | Nonsense    | Female | 51        | NA                | NA       | NA           | +                  | Optic atrophy                 | +               | +/+                        | NA                   | NA                         | No             | Not able to speak, but uses sign language | Progressive swallowing difficulties                                                                       | Ligt et al. 2012 [4], Tucci et al. 2014 [28]     |
| 48               | E10     | c.1603C>T         | p.Arg535Ter      | Nonsense    | Male   | 3,25      | NA                | 3050     | NA           | +                  | Strabismus                    | +               | +/+                        | 8                    | NA                         | Unable to walk | Lots of noises but no words               | Dystonia                                                                                                  | Kharbanda et al. 2017 [30]                       |
| 49               | E10     | c.1603C>T         | p.Arg535Ter      | Nonsense    | Female | 15 mo     | NA                | 2350     | NA           | +                  | FEVR                          | +               | +/-                        | NA                   | NA                         | NA             | Can make some sounds                      | NA                                                                                                        | Ke et al. 2020 [39]                              |
| 50               | E10     | c.1603C>T         | p.Arg535Ter      | Nonsense    | NA     | NA        | NA                | NA       | NA           | NA                 | NA                            | NA              | NA                         | NA                   | NA                         | NA             | NA                                        | NA                                                                                                        | Retterer et al. 2016 [25]                        |
| 51               | E10     | c.1603C>T         | p.Arg535Ter      | Nonsense    | Male   | 14        | NA                | 3400     | NA           | +                  | NA                            | -               | -/+                        | 15                   | NA                         | not walking    | Moderate; Single words at 14 years        | Aggressive, truncal obesity; absent left testis; brachydactyly; achilles tendon contracture               | Kharbanda et al. 2017 [30]                       |
| 52               | E10     | c.1603C>T         | p.Arg535*        | Nonsense    | Male   | Died      | NA                | NA       | NA           | NA                 | NA                            | NA              | NA                         | NA                   | NA                         | NA             | NA                                        | Dieat at 4 months; abnormal lung growth, pulmonary hypertension                                           | Karolak et al. 2019 [42]                         |
| 53               | E10     | c.1603C>T         | p.Arg535*        | Nonsense    | Male   | NA        | NA                | NA       | NA           | NA                 | NA                            | NA              | NA                         | NA                   | NA                         | NA             | NA                                        | NA                                                                                                        | Grozeva et al. 2015 [31]                         |
| 54               | E10     | c.1603C>T         | p.Arg535*        | Nonsense    | Female | 15 mo     | NA                | 2350     | NA           | NA                 | FEVR, strabismus              | +               | +/-                        | Not yet              | Not yet                    | Not yet        | Only sounds at 15 months                  | NA                                                                                                        | Ke et al. 2020 [39]                              |
| 55               | E10     | c.1612C>T         | p.Gln538Ter      | Nonsense    | Female | 4,5       | NA                | 2345     | NA           | +                  | Strabismus                    | +               | +/+                        | 23                   | NA                         | 2,5-3 years    | First words at 3.4 years                  | Autism                                                                                                    | Kharbanda et al. 2017 [30]                       |
| 56               | E10     | c.1652C>T         | p.Thr551Met      | Missense    | NA     | NA        | NA                | NA       | NA           | NA                 | NA                            | NA              | NA                         | NA                   | NA                         | NA             | NA                                        | Autism                                                                                                    | O’Roak et al. 2017 [44], Tucci et al. 2014 [28]  |
| 57               | E10     | c.1665dupG        | p.Thr556fs       | Frameshift  | Male   | 4         | NA                | NA       | NA           | NA                 | Retinopathy and strabismus    | +               | +/+                        | NA                   | NA                         | NA             | NA                                        | GDD, ASD, spastic diplegia, aggressive, premature birth (24mo), choreiform movements and intention tremor | Rossetti et al. 2021 [22]                        |
| 58               | E10     | c.1672C>T         | p.Gln558*        | Nonsense    | Male   | 15 mo     | NA                | 3600     | NA           | NA                 | FEVR                          | +               | +/-                        | not yet              | not yet                    | not yet        | No language at 15 months                  | Mild thumb adduction                                                                                      | Li et al. 2017 [7]                               |
| 59               | E10     | c.1677delA        | p.Gln559Hisfs*11 | Frameshift  | NA     | NA        | NA                | NA       | NA           | NA                 | NA                            | NA              | NA                         | NA                   | NA                         | NA             | NA                                        | Multiple congenital anomalies                                                                             | Retterer et al. 2016 [25]                        |

|    | Genetic mutation |                      |                   |                     | Gender | Age (yrs) | Birth measurments |            |          | Facial dysmorphism | Eye conditions                                                           | Micro-encephaly | Axial hypotonia/spasticity | Achieving milestones |               |                            |                                                                                        | Additional clinical features                                                                                      | Source (data quality assessment) |
|----|------------------|----------------------|-------------------|---------------------|--------|-----------|-------------------|------------|----------|--------------------|--------------------------------------------------------------------------|-----------------|----------------------------|----------------------|---------------|----------------------------|----------------------------------------------------------------------------------------|-------------------------------------------------------------------------------------------------------------------|----------------------------------|
|    | Exon             | Variant              | Amino acid change | Mutation type       |        |           | Lenght (cm)       | Weight (g) | OFC (cm) |                    |                                                                          |                 |                            | Sitting (mo)         | Crawling (mo) | Walking independetly (yrs) | Speaking                                                                               |                                                                                                                   |                                  |
| 60 | Intron 10        | c.1683+1G>A          | Splice mutation   | Splice --> nonsense | Female | 2,4       | 51                | 3630       | 34,5     | +                  | Normal                                                                   | +               | +/-                        | not yet              | not yet       | not yet                    | Severe, no words; only syllables                                                       | At age 2 months she suffered from skin problems (diaper rash and later eczema), aggressive and emotional problems | Kuechler et al. 2015 [2]         |
| 61 | E11              | c.1723G>A            | p.Gly575Arg       | Missense            | Female | 11        | NA                | NA         | NA       | NA                 | FEVR, legal blind on the right eye, totla retinal detachment on left eye | +               | +/+                        | NA                   | NA            | NA                         | NA                                                                                     | Repetative behaviours of hand-wringling and nail-picking                                                          | Rossetti et al. 2021 [22]        |
| 62 | E11              | c.1738_1742delinsACA | p.Leu580Thrfs*28  | Frameshift          | NA     | NA        | NA                | NA         | NA       | NA                 | FEVR                                                                     | NA              | NA                         | NA                   | NA            | NA                         | NA                                                                                     | NA                                                                                                                | Sun et al. 2019 [33]             |
| 63 | E11              | c.1759C>T            | p.Arg587*         | Nonsense            | NA     | NA        | NA                | NA         | NA       | NA                 | NA                                                                       | NA              | NA                         | NA                   | NA            | NA                         | NA                                                                                     | NA                                                                                                                | Yoo et al. 2017 [40]             |
| 64 | E11              | c.1759C>T            | p.Arg587*         | Nonsense            | Female | 4         | NA                | NA         | NA       | NA                 | normal                                                                   | +               | +/+                        | NA                   | NA            | NA                         | NA                                                                                     | Bicoronal craniosynostosis                                                                                        | Ho et al. 2021 [24]              |
| 65 | E11              | c.1801C>T            | p.Gln601Ter       | Nonsense            | Male   | 6,2       | NA                | 2098       | NA       | +                  | FEVR                                                                     | +               | +/NA                       | NA                   | NA            | not yet                    | Says Mom and Dad with understanding, uses some Makaton signs, points to the body parts | Stereotypic and aggressive behaviour, single supernumerary upper incisor; bilateral orchidopexies                 | Kharbanda et al. 2017 [30]       |
| 66 | E12              |                      |                   | Frameshift          | Male   | 13        | NA                | NA         | NA       | NA                 | normal                                                                   | -               | +/+                        | NA                   | NA            | NA                         | NA                                                                                     | DMD, dystonia                                                                                                     | Ho et al. 2021 [24]              |
| 67 | E12              | c.1867C>T            | p.Gln623*         | Nonsense            | NA     | 4         | NA                | NA         | NA       | NA                 | Retinal detachment                                                       | NA              | NA                         | NA                   | NA            | NA                         | NA                                                                                     | NA                                                                                                                | Sun et al. 2019 [33]             |
| 68 | E12              | c.1923dupA           | p.Glu642Argfs*6   | Frameshift          | Male   | 8,5       | 50                | 2880       | 31       | +                  | Strabismus, hyperopia                                                    | +               | +/+                        | NA                   | 14            | 8 years                    | Severe; few single words, gestures                                                     | Good social contact, aggressive behaviour, frequent infections, syringomyelia                                     | Kuechler et al. 2015 [2]         |
| 69 | E12              | c.1925_1926del       | p.Glu642Valfs*5   | Frameshift          | Female | 14,2      | 48                | 3030       | NA       | +                  | Strabismus                                                               | -               | -/+                        | not yet              | NA            | No                         | Moderate, first words at 6 years; not speak in sentences                               | Autism, short eye contact, tantrums, generalized pyramidal symptoms                                               | Kuechler et al. 2015 [2]         |
| 70 | E12              | c.1943A>G            | p.N648S           | Missense            | NA     | NA        | NA                | NA         | NA       | NA                 | NA                                                                       | NA              | NA                         | NA                   | NA            | NA                         | NA                                                                                     | Severe paranoid schizophrenia                                                                                     | Levchenko et al. 2015 [27]       |
| 71 | E13              | c.1962T>A            | p.Tyr654*         | Nonsense            | Male   | 2         | NA                | NA         | NA       | NA                 | Intermittent exotropia, mild hyperopia, strabismus                       | +               | +/+                        | NA                   | NA            | NA                         | NA                                                                                     | GDD, spastic diplegia                                                                                             | Rossetti et al 2021 [22]         |
| 72 | E13              | c.1981C>T            | p.Arg661Ter       | Nonsense            | Female | 9,2       | NA                | 2530       | NA       | +                  | NA                                                                       | +               | +/-                        | 11                   | NA            | 2,5                        | First words at 3,4 years                                                               | Obsessional behaviour; Dyspraxia; slightly delayed bone age;                                                      | Kharbanda et al. 2017 [30]       |

|                  |                |                                                       |                  |            |              |                   |               |             |                           |                |                                                   |                                           |                      |                   |                                 |                       |                                                                                    | hypermobile joints;<br>glue ear                                                           |                             |
|------------------|----------------|-------------------------------------------------------|------------------|------------|--------------|-------------------|---------------|-------------|---------------------------|----------------|---------------------------------------------------|-------------------------------------------|----------------------|-------------------|---------------------------------|-----------------------|------------------------------------------------------------------------------------|-------------------------------------------------------------------------------------------|-----------------------------|
| Genetic mutation |                |                                                       |                  | Gender     | Age<br>(yrs) | Birth measurments |               |             | Facial<br>dysmor<br>phism | Eye conditions | Micro-<br>enceph<br>aly                           | Axial<br>hypotonia/<br>spasticity<br>Exon | Achieving milestones |                   |                                 |                       | Additional clinical<br>features                                                    | Source (data quality<br>assessment)                                                       |                             |
| Exon             | Variant        | Amino acid<br>change                                  | Mutation<br>type |            |              | Lenght<br>(cm)    | Weight<br>(g) | OFC<br>(cm) |                           |                |                                                   |                                           | Sitting<br>(mo)      | Crawli<br>ng (mo) | Walking<br>independtly<br>(yrs) | Speaking              |                                                                                    |                                                                                           |                             |
| 73               | E13            | c.2038_2041<br>dup                                    | p.Ser681*        | Nonsense   | Female       | 13,2              | NA            | 2523        | NA                        | +              | Strabismus,<br>myopia                             | -                                         | +/+                  | 12                | NA                              | 1,5                   | Mild, full sentences,<br>but delayed                                               | Social, autism,<br>aggressive behaviour,<br>ADHD, scoliosis and a<br>tethered spinal cord | Kuechler et al. 2015 [2]    |
| 74               | E13            | c.2038_2041<br>dup                                    | p.Ser681*        | Nonsense   | Female       | 11                | NA            | 2891        | NA                        | +              | Strabismus,<br>myopia                             | +                                         | +/+                  | 12                | 17                              | 2                     | Mild, full sentences,<br>but delayed                                               | Communicative, social,<br>aggression, ADHD                                                | Kuechler et al. 2015 [2]    |
| 75               | E13            | c.2038_2041<br>dup                                    | p.Ser681*        | Nonsense   | NA           | NA                | NA            | NA          | NA                        | NA             | NA                                                | NA                                        | NA                   | NA                | NA                              | NA                    | NA                                                                                 | Multiple congenital<br>anomalies                                                          | Retterer et al. 2016 [25]   |
| 76               | E13            | c.2046_2047<br>del                                    | p.Phe683Glnfs*9  | Frameshift | Male         | 8 mo              | NA            | 3146        | NA                        | NA             | Myopia                                            | NA                                        | NA                   | NA                | NA                              | NA                    | NA                                                                                 | NA                                                                                        | Coussa et al. 2020 [36]     |
| 77               | E14            | c.2092_2096<br>dup                                    | p.Ile700Leufs*37 | Frameshift | Female       | 7                 | NA            | NA          | NA                        | NA             | Bilateral FEVR,<br>right convergent<br>strabismus | +                                         | -/+                  | NA                | NA                              | NA                    | NA                                                                                 | NA                                                                                        | Ho et al. 2021 [24]         |
| 78               | E14            | c.2092_2096<br>dup                                    | p.Ile700Leufs*37 | Frameshift | Female       | 37                | NA            | NA          | NA                        | NA             | Normal                                            | -                                         | -/-                  | NA                | NA                              | NA                    | Full sentences                                                                     | NA                                                                                        | Ho et al. 2021 [24]         |
| 79               | E14            | c.2112_2116<br>dup                                    | p.Pro706Glnfs*31 | Frameshift | Male         | 22<br>mo          | NA            | 1842        | NA                        | NA             | FEVR                                              | NA                                        | NA                   | NA                | NA                              | NA                    | NA                                                                                 | ASD                                                                                       | Dixon et al. 2016 [37]      |
| 80               | E14            | c.2128C>T                                             | p.Arg710Cys      | Missense   | inherited    | NA                | NA            | NA          | NA                        | normal         | FEVR                                              | NA                                        | Normal               | Normal            | normal                          | normal                | normal                                                                             | NA                                                                                        | Panagiotou et al. 2017 [35] |
| 81               | E15            | c.2142_2157<br>dup16                                  | p.His720*        | Nonsense   | inherited    | NA                | NA            | NA          | NA                        | normal         | FEVR                                              | NA                                        | Normal               | Normal            | normal                          | normal                | normal                                                                             | NA                                                                                        | Panagiotou et al. 2017 [35] |
| 82               | E15            | c.2273del                                             | p.His758Leufs*30 | Frameshift | Male         | 14                | NA            | NA          | NA                        | NA             | NA                                                | -                                         | NA                   | NA                | NA                              | NA                    | NA                                                                                 | Autism, severe ID                                                                         | Thevenon et al. 2016 [38]   |
| 83               | Entire<br>gene | 333 kb incl.<br>entire gene<br>& ex. 35-37<br>of ULK4 | Gross del        | None       | Female       | 5,2               | 43,5          | 2100        | 30,5                      | +              | Hyperopia                                         | +                                         | +/-                  | 14                | NA                              | 4,5 years<br>(ataxic) | At 4.5 years could<br>combine several<br>words, count to 10                        | Friendly, social, short<br>focus, orofacial<br>dyspraxia; sacral<br>dimple                | Dubruc et al. 2014 [41]     |
| 84               | Entire<br>gene | 505 kb incl.<br>entire gene                           | Gross del        | None       | Male         | 3                 | 45,5          | 2107        | 29,5                      | +              | Esotropia                                         | +                                         | +/-                  | NA                | not yet                         | not yet               | Babbles and say<br>“mama” and “dada”<br>specifically shortly<br>before age 3 years | Happy, good eye<br>contact, dystonic<br>movement                                          | Kuechler et al. 2015 [2]    |
